# Supplementary material for: Single-, double-, and triple-atom catalysts on graphene-like C2N enable electrocatalytic nitrogen reduction: insight from first principles
Source: Royal Society of Chemistry journal article supplement (doi:10.1039/d1cy02254g), 2022-01-01
Supplement: d1cy02254g1.pdf [file d1cy02254g1.pdf]

*Supplementary Information(SI)*

**Single-, double-, and triple-atom catalysts on graphene-like C<sub>2</sub>N enable  
electrocatalytic nitrogen reduction: insight from first principles**

Jin Zhang, Wei An\*

*College of Chemistry and Chemical Engineering, Shanghai University of Engineering Science, 333  
Longteng Road, Songjiang District, Shanghai 201620, China*

\*E-mail: [weian@sues.edu.cn](mailto:weian@sues.edu.cn)

**Table S1.** Zero-point energy (ZPE, eV) and entropy correction (TS, eV) at T = 298 K for adsorbates on Ni<sub>2</sub>@C<sub>2</sub>N.

| Configuration | adsorbate                        | ZPE/(eV) | TS/(eV) |
|---------------|----------------------------------|----------|---------|
| Enzymatic     | *N <sub>2</sub>                  | 0.19     | 0.13    |
|               | *NNH                             | 0.52     | 0.09    |
|               | *NHNH                            | 0.83     | 0.11    |
|               | *NHNH <sub>2</sub>               | 1.19     | 0.11    |
|               | *NH <sub>2</sub> NH <sub>2</sub> | 1.49     | 0.11    |
|               | *NH <sub>2</sub>                 | 0.72     | 0.06    |
|               | *NH <sub>3</sub>                 | 1.04     | 0.13    |

**Table S2.** The M<sub>3</sub>@C<sub>2</sub>N three possible configurations and their corresponding binding energy (BE, in eV)<sup>1</sup>. The gray, blue, and green spheres represent C, N, and M<sub>3</sub> atoms, respectively. Bold fonts represent the most stable configuration.

| M <sub>3</sub> @C <sub>2</sub> N | BE           |              |       |       |
|----------------------------------|--------------|--------------|-------|-------|
|                                  | I            | II           | III   | IV    |
| Cr                               | <b>-6.50</b> | /            | -6.02 | -5.73 |
| Fe                               | <b>-6.74</b> | /            | -5.92 | -5.43 |
| Co                               | <b>-7.03</b> | /            | -6.01 | -5.14 |
| Ni                               | <b>-6.93</b> | /            | -5.58 | -4.79 |
| Mo                               | /            | <b>-7.60</b> | -7.09 | -6.45 |
| W                                | /            | <b>-7.85</b> | -7.10 | -6.04 |

<sup>1</sup>BE = E<sub>M<sub>n</sub>@C<sub>2</sub>N</sub> - E<sub>M<sub>n</sub></sub> - E<sub>C<sub>2</sub>N</sub>, where E<sub>M<sub>n</sub>@C<sub>2</sub>N</sub>, E<sub>C<sub>2</sub>N</sub> and E<sub>M<sub>n</sub></sub> are the total energies of M<sub>n</sub>@C<sub>2</sub>N system, the C<sub>2</sub>N monolayer, and the isolated M<sub>n</sub> cluster, respectively.

**Table S3.** DFT-calculated Bader charge transfer (Δq) from M<sub>n</sub> to C<sub>2</sub>N substrate equivalent to oxidation state of M<sub>n</sub><sup>δ+</sup>.

|    | M <sub>1</sub> @C <sub>2</sub> N | M <sub>2</sub> @C <sub>2</sub> N                           | M <sub>3</sub> @C <sub>2</sub> N                                                         |
|----|----------------------------------|------------------------------------------------------------|------------------------------------------------------------------------------------------|
|    | M <sub>1</sub> <sup>δ+</sup>     | M <sub>1</sub> <sup>δ+</sup> /M <sub>2</sub> <sup>δ+</sup> | M <sub>1</sub> <sup>δ+</sup> /M <sub>2</sub> <sup>δ+</sup> /M <sub>3</sub> <sup>δ+</sup> |
| Cr | +1.28                            | +0.88/+0.88                                                | +0.72/+0.62/+0.79                                                                        |
| Fe | +1.11                            | +0.74/+0.74                                                | +0.60/+0.48/+0.60                                                                        |
| Co | +0.85                            | +0.66/+0.66                                                | +0.46/+0.45/+0.48                                                                        |
| Ni | +0.77                            | +0.57/+0.60                                                | +0.42/+0.41/+0.44                                                                        |
| Mo | +1.29                            | +0.92/+0.91                                                | +0.43/+0.71/+0.96                                                                        |
| W  | +1.36                            | +0.98/+0.99                                                | +0.40/+0.77/+1.06                                                                        |

**Table S4.** DFT-calculated binding energy ( $BE$ , eV), Bader charge transfer ( $\Delta q$ ,  $e^-$ )<sup>1</sup>, the spin magnetic moment ( $\mu$ ), adsorption energy ( $E_{\text{ads}}$ , eV) and bond length of  $^*\text{N}_2$  ( $BL$ , in Å)<sup>2</sup>.

|              |    | $\text{M}_n@C_2N$ |              |                      | $^*\text{N}_2/\text{M}_n@C_2N$ |                  |         |       |                    |                  |        |       |
|--------------|----|-------------------|--------------|----------------------|--------------------------------|------------------|---------|-------|--------------------|------------------|--------|-------|
|              |    | $BE$              | $E_c$        | $\mu$                | $\Delta q$ , $e^-$             |                  | Side-on |       | $\Delta q$ , $e^-$ |                  | End-on |       |
|              |    | slab              | $\text{M}_n$ | $\text{M}_n$ cluster | $^*\text{N}_2$                 | $E_{\text{ads}}$ | $BL$    | $\mu$ | $\text{N}_2$       | $E_{\text{ads}}$ | $BL$   | $\mu$ |
| $\text{M}_1$ | Cr | -4.36             | -4.02        | 6.0                  | /                              | /                | /       | /     | 0.22               | -0.26            | 1.12   | 2.0   |
|              | Fe | -4.38             | -4.90        | 4.0                  | 0.31                           | -0.22            | 1.15    | 4.0   | 0.24               | -0.76            | 1.13   | 2.0   |
|              | Co | -4.25             | -5.14        | 3.0                  | 0.32                           | -0.34            | 1.16    | 1.0   | 0.25               | -0.93            | 1.13   | 1.0   |
|              | Ni | -4.91             | -4.89        | 2.0                  | 0.26                           | -0.09            | 1.15    | 0.0   | 0.19               | -0.58            | 1.13   | 1.0   |
|              | Mo | -5.14             | -6.31        | 6.0                  | 0.46                           | -0.31            | 1.18    | 2.0   | 0.37               | -0.85            | 1.15   | 2.0   |
|              | W  | -5.94             | -8.38        | 6.0                  | 0.57                           | -0.65            | 1.20    | 2.0   | 0.42               | -1.10            | 1.15   | 2.0   |
| $\text{M}_2$ | Cr | -5.99             | -4.19        | 4.0                  | 0.74                           | -1.65            | 1.20    | 0.0   | 0.36               | -1.07            | 1.14   | 2.0   |
|              | Fe | -5.66             | -3.59        | 6.0                  | 0.54                           | -0.84            | 1.17    | 2.0   | 0.33               | -0.85            | 1.14   | 2.0   |
|              | Co | -5.50             | -3.67        | 4.0                  | 0.47                           | -0.68            | 1.17    | 0.0   | 0.37               | -1.07            | 1.15   | 0.0   |
|              | Ni | -5.71             | -3.34        | 2.0                  | 0.39                           | -0.15            | 1.17    | 2.0   | 0.35               | -0.49            | 1.15   | 2.0   |
|              | Mo | -6.72             | -4.36        | 0.0                  | 0.66                           | -0.33            | 1.22    | 0.0   | 0.33               | -0.87            | 1.14   | 2.0   |
|              | W  | -8.65             | -6.01        | 0.0                  | 1.06                           | -0.81            | 1.29    | 0.0   | 0.35               | -0.89            | 1.14   | 0.0   |
| $\text{M}_3$ | Cr | -6.50             | -3.17        | 6.0                  | 1.24                           | -1.93            | 1.31    | 4.0   | 0.55               | -1.33            | 1.16   | 2.0   |
|              | Fe | -6.74             | -3.15        | 10.0                 | 0.92                           | -1.55            | 1.26    | 6.0   | 0.48               | -1.01            | 1.16   | 6.0   |
|              | Co | -7.03             | -3.33        | 6.5                  | 0.85                           | -1.34            | 1.26    | 3.0   | 0.32               | -1.19            | 1.16   | 1.2   |
|              | Ni | -6.93             | -2.93        | 2.0                  | 0.62                           | -0.87            | 1.22    | 0.0   | 0.46               | -1.27            | 1.16   | 0.0   |
|              | Mo | -7.60             | -4.20        | 2.0                  | 0.73                           | -1.36            | 1.20    | 0.0   | 0.34               | -1.11            | 1.14   | 0.0   |
|              | W  | -7.85             | -4.94        | 2.0                  | 0.89                           | -1.51            | 1.23    | 0.0   | 0.31               | -1.17            | 1.14   | 0.0   |

<sup>1</sup>Positive values denote partial charge gained by  $^*\text{N}_2$ .

<sup>2</sup>Calculated  $BL$  for gaseous  $\text{N}_2$  is 1.115 Å.

**Table S5.** DFT-calculated dissolution potential ( $U_{\text{dis}}$ )<sup>1</sup> of  $\text{M}_n$  in  $C_2N$ .

|    | $U_M^0$ | $n$ | $\text{M}_1$     | $\text{M}_2$     | $\text{M}_3$     |
|----|---------|-----|------------------|------------------|------------------|
|    |         |     | $U_{\text{dis}}$ | $U_{\text{dis}}$ | $U_{\text{dis}}$ |
| Cr | -0.91   | 2   | -0.74            | -1.87            | -1.63            |
| Fe | -0.45   | 2   | -0.71            | -0.95            | -1.05            |
| Co | -0.28   | 2   | -0.72            | -0.76            | -0.84            |
| Ni | -0.26   | 2   | -0.48            | -0.52            | -0.71            |
| Mo | -0.20   | 3   | -0.59            | -0.48            | -1.19            |
| W  | 0.10    | 3   | -0.71            | -0.21            | -1.10            |

<sup>1</sup> $U_{\text{dis}} = U_M^{0+} [\mu_{\text{M,bulk}} - (E_{\text{M}_n@C_2N} - E_{\text{M}_{n-1}@C_2N})]/ne$ , where  $U_M^0$  is standard dissolution potential of M in bulk form.

**Table S6.** DFT-calculated oxidation state of  $M_n$  as a result of side-on  $*N_2$  adsorption on  $M_n@C_2N$ .

|    | $M_1@C_2N$      | $M_2@C_2N$                    | $M_3@C_2N$                                  |
|----|-----------------|-------------------------------|---------------------------------------------|
|    | $M_1^{\delta+}$ | $M_1^{\delta+}/M_2^{\delta+}$ | $M_1^{\delta+}/M_2^{\delta+}/M_3^{\delta+}$ |
| Cr | /               | +1.20/+1.18                   | +0.96/+1.02/+1.12                           |
| Fe | +1.14           | +0.95/+0.90                   | +0.81/+0.83/+0.83                           |
| Co | +0.95           | +0.83/+0.79                   | +0.69/+0.70/+0.71                           |
| Ni | +0.78           | +0.68/+0.66                   | +0.58/+0.60/+0.63                           |
| Mo | +1.51           | +1.24/+1.17                   | +0.80/+1.06/+1.04                           |
| W  | +1.65           | +1.54/+1.59                   | +0.83/+1.20/+1.13                           |

**Table S7.** The adsorption energy ( $E_{ads}$ ) of  $*N_2$ ,  $*N_2H$ ,  $*NH_2$  and  $*NH_3$  of the two adsorption configurations.

|       |       | Side-on         |                  | End-on          |                  | Side-on/End-on   |                  |
|-------|-------|-----------------|------------------|-----------------|------------------|------------------|------------------|
|       |       | $E_{ads}(*N_2)$ | $E_{ads}(*N_2H)$ | $E_{ads}(*N_2)$ | $E_{ads}(*N_2H)$ | $E_{ads}(*NH_2)$ | $E_{ads}(*NH_3)$ |
| $M_1$ | Cr    | /               | /                | -0.26           | -1.51            | -2.71            | -1.17            |
|       | Fe    | -0.22           | -1.38            | -0.76           | -1.72            | -2.71            | -1.25            |
|       | Co    | -0.34           | -1.61            | -0.93           | -1.92            | -2.51            | -1.31            |
|       | Ni    | -0.09           | -1.47            | -0.58           | -1.62            | -2.19            | -1.19            |
|       | Mo    | -0.31           | -2.05            | -0.85           | -2.68            | -3.25            | -1.04            |
|       | W     | -0.65           | -2.69            | -1.10           | -3.12            | -3.75            | -1.42            |
|       | $M_2$ | Cr              | -1.65            | -3.82           | -1.31            | -3.02            | -4.39            |
| Fe    |       | -0.84           | -2.36            | -0.78           | -2.58            | -3.77            | -1.00            |
| Co    |       | -0.68           | -2.35            | -1.07           | -2.75            | -3.81            | -1.06            |
| Ni    |       | -0.15           | -2.07            | -0.49           | -2.37            | -3.17            | -0.61            |
| Mo    |       | -0.33           | -2.66            | -0.87           | -2.55            | -3.66            | -1.16            |
| W     |       | -0.81           | -3.20            | -0.89           | -2.79            | -3.80            | -1.20            |
| $M_3$ |       | Cr              | -1.93            | -4.14           | -1.33            | -3.44            | -4.67            |
|       | Fe    | -1.55           | -3.49            | -1.01           | -3.22            | -4.21            | -1.08            |
|       | Co    | -1.34           | -3.56            | -1.19           | -3.19            | -4.10            | -1.17            |
|       | Ni    | -0.87           | -3.06            | -1.27           | -2.83            | -3.67            | -0.92            |
|       | Mo    | -1.36           | -3.30            | -1.11           | -3.05            | -4.27            | -1.49            |
|       | W     | -1.51           | -3.58            | -1.17           | -3.13            | -4.29            | -1.58            |

**Table S8.** Gibbs free energy change ( $\Delta G$ , in eV) for the first PCET step ( $*N_2 + H^+ + e^- \rightarrow *NNH$ ) and the last PCET step ( $*NH_2 + H^+ + e^- \rightarrow *NH_3$ ) of the two adsorption configurations as well as desorption of  $*NH_3$  with solvation corrections included, at  $T = 298.15$  K. The  $\Delta G^{de}(*NH_3)$  in italics represent the data above the threshold value ( $0.75\text{eV}$ )<sup>1</sup> that can be regarded as insurmountable for reactions or desorption occurring at room temperature.

|                |    | Side-on          |                   | End-on           |                   | Side-on/End-on    |                |                        |
|----------------|----|------------------|-------------------|------------------|-------------------|-------------------|----------------|------------------------|
|                |    | $\Delta G(*N_2)$ | $\Delta G(*N_2H)$ | $\Delta G(*N_2)$ | $\Delta G(*N_2H)$ | $\Delta G(*NH_3)$ | $\Delta G(*H)$ | $\Delta G^{de}(*NH_3)$ |
| M <sub>1</sub> | Cr | /                | /                 | 0.28             | 0.99              | -0.70             | 0.56           | 0.67                   |
|                | Fe | 0.26             | 1.11              | -0.16            | 1.20              | -0.80             | 0.79           | 0.79                   |
|                | Co | 0.14             | 1.01              | -0.40            | 1.25              | -1.05             | 0.37           | 0.82                   |
|                | Ni | 0.39             | 0.93              | -0.06            | 1.22              | -1.23             | 0.64           | 0.70                   |
|                | Mo | 0.21             | 0.51              | -0.30            | 0.39              | -0.10             | -0.17          | 0.57                   |
|                | W  | -0.11            | 0.21              | -0.54            | 0.20              | 0.06              | -0.53          | 0.92                   |
| M <sub>2</sub> | Cr | -1.11            | 0.10              | -0.77            | 0.53              | 0.66              | -0.20          | 0.89                   |
|                | Fe | -0.29            | 0.74              | -0.23            | 0.47              | 0.38              | -0.02          | 0.55                   |
|                | Co | -0.14            | 0.61              | -0.51            | 0.59              | 0.34              | -0.18          | 0.60                   |
|                | Ni | 0.36             | 0.41              | 0.03             | 0.43              | 0.16              | 0.03           | 0.15                   |
|                | Mo | 0.23             | -0.17             | -0.33            | 0.57              | 0.07              | -0.11          | 0.73                   |
|                | W  | -0.23            | -0.18             | -0.35            | 0.37              | 0.16              | -0.32          | 0.77                   |
| M <sub>3</sub> | Cr | -1.34            | 0.03              | -0.73            | 0.09              | 0.84              | -0.33          | 1.00                   |
|                | Fe | -0.98            | 0.33              | -0.48            | 0.05              | 0.70              | -0.52          | 0.67                   |
|                | Co | -0.76            | 0.06              | -0.56            | 0.16              | 0.52              | -0.25          | 0.73                   |
|                | Ni | -0.31            | 0.14              | -0.71            | 0.66              | 0.31              | -0.34          | 0.49                   |
|                | Mo | -0.79            | 0.33              | -0.57            | 0.32              | 0.37              | -0.42          | 1.07                   |
|                | W  | -0.92            | 0.15              | -0.60            | 0.28              | 0.31              | -0.55          | 1.14                   |

**Table S9.** DFT-calculated variation in spin magnetic moment ( $\mu$ ,  $\mu_B$ ) for adsorbates on  $M_n@C_2N$  during the progress of HER and NRR.

|                |    |     |      | side-on | side-on | $*NH_2$ | $*NH_3$ |
|----------------|----|-----|------|---------|---------|---------|---------|
|                |    | *   | $*H$ | $*N_2$  | $*N_2H$ |         |         |
| M <sub>1</sub> | Fe | 4.0 | 1.0  | 4.0     | 1.8     | 3.0     | 3.5     |
|                | Co | 1.0 | 2.0  | 1.0     | 0.0     | 0.0     | 2.1     |
|                | Ni | 2.0 | 1.0  | 0.0     | 0.8     | 1.0     | 1.8     |
|                | Cr | 4.0 | 3.0  | /       | /       | /       | /       |
|                | Mo | 2.0 | 1.0  | 2.0     | 1.0     | 1.0     | 2.0     |
|                | W  | 2.0 | 1.0  | 2.0     | 0.4     | 1.0     | 2.0     |
| M <sub>2</sub> | Fe | 4.0 | 2.0  | 2.0     | 3.0     | 3.0     | 4.0     |
|                | Co | 2.0 | 0.0  | 0.0     | 1.0     | 1.0     | 0.9     |
|                | Ni | 0.0 | 1.0  | 2.0     | 0.0     | 0.5     | 1.5     |
|                | Cr | 2.0 | 0.0  | 0.0     | 1.0     | 5.0     | 4.0     |
|                | Mo | 0.0 | 2.0  | 0.0     | 0.9     | 1.0     | 0.0     |
|                | W  | 0.0 | 0.0  | 0.0     | 0.0     | 1.0     | 0.0     |

|                |    |     |     |     |     |     |     |
|----------------|----|-----|-----|-----|-----|-----|-----|
|                | Fe | 6.0 | 7.0 | 6.0 | 4.9 | 9.0 | 5.8 |
|                | Co | 3.0 | 3.0 | 3.0 | 0.0 | 3.0 | 1.0 |
| M <sub>3</sub> | Ni | 0.0 | 0.0 | 0.0 | 0.5 | 0.5 | 1.7 |
|                | Cr | 4.0 | 3.0 | 4.0 | 3.0 | 3.0 | 2.0 |
|                | Mo | 0.0 | 0.0 | 0.0 | 1.0 | 0.3 | 0.0 |
|                | W  | 0.0 | 0.0 | 0.0 | 1.0 | 0.3 | 0.0 |

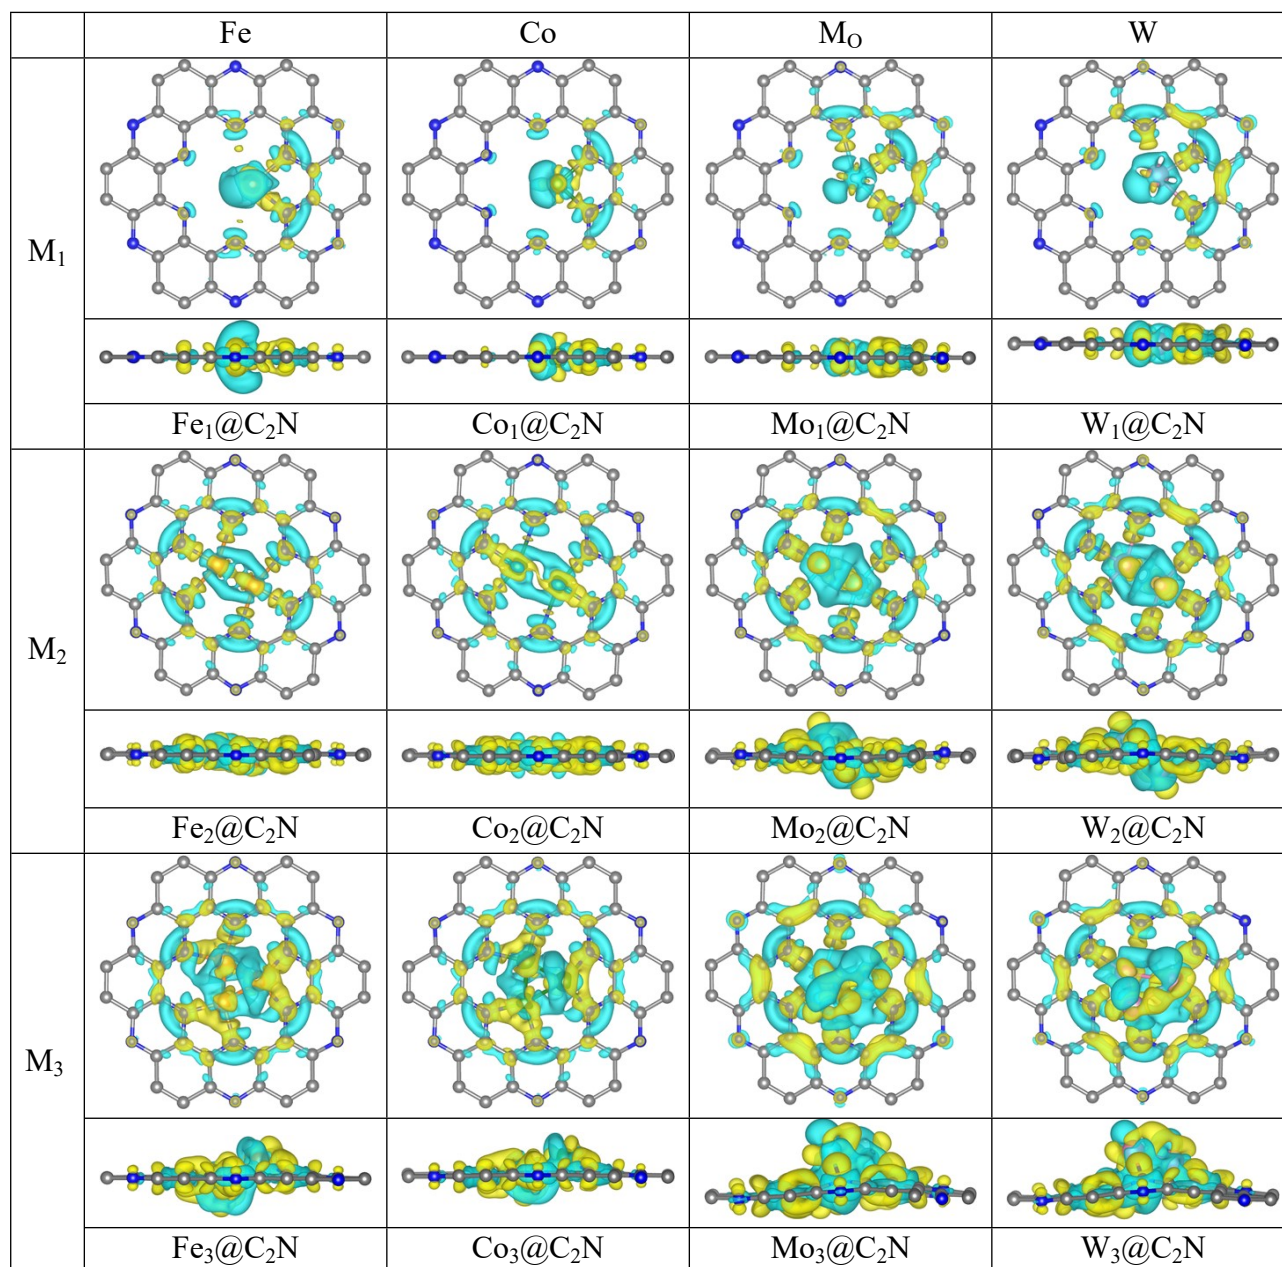

**Figure S1.** The differential charge diagram of M<sub>n</sub>@C<sub>2</sub>N along with isosurface of charge density difference ( $\Delta\rho$ ), where  $\Delta\rho = \rho_{(M_n@C_2N)} - \rho_{(C_2N)} - \rho_{(M_n)}$ , and isosurface level=0.004 e/Bohr<sup>3</sup>. Yellow: charge accumulation; Cyan: charge depletion.

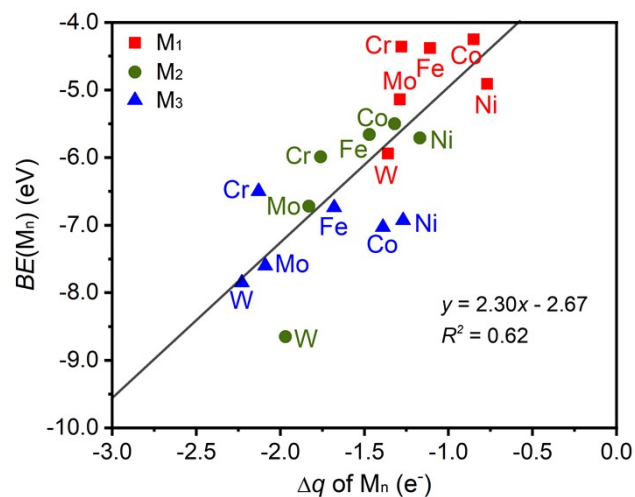

**Figure S2.** Linear trend of charge transfer ( $\Delta q$ ) and binding energy ( $BE$ ) of  $M_n$ .

|       | Fe             | Co             | Ni              | Cr             | Mo             | W              |
|-------|----------------|----------------|-----------------|----------------|----------------|----------------|
| $M_1$ |                |                |                 |                |                |                |
|       |                |                |                 |                |                |                |
|       | $\mu = 4\mu_B$ | $\mu = 1\mu_B$ | $\mu = -2\mu_B$ | $\mu = 4\mu_B$ | $\mu = 2\mu_B$ | $\mu = 2\mu_B$ |
| $M_2$ |                |                |                 |                |                |                |
|       |                |                |                 |                |                |                |
|       | $\mu = 4\mu_B$ | $\mu = 2\mu_B$ | $\mu = 0\mu_B$  | $\mu = 2\mu_B$ | $\mu = 0\mu_B$ | $\mu = 0\mu_B$ |
| $M_3$ |                |                |                 |                |                |                |
|       |                |                |                 |                |                |                |
|       | $\mu = 6\mu_B$ | $\mu = 3\mu_B$ | $\mu = 0\mu_B$  | $\mu = 4\mu_B$ | $\mu = 0\mu_B$ | $\mu = 0\mu_B$ |

**Figure S3.** Net spin density for  $M_n@C_2N$  ( $M = Fe, Co, Ni, Cr, Mo$  and  $W$ ) at the isosurface level of  $0.004 e/Bohr^3$ .

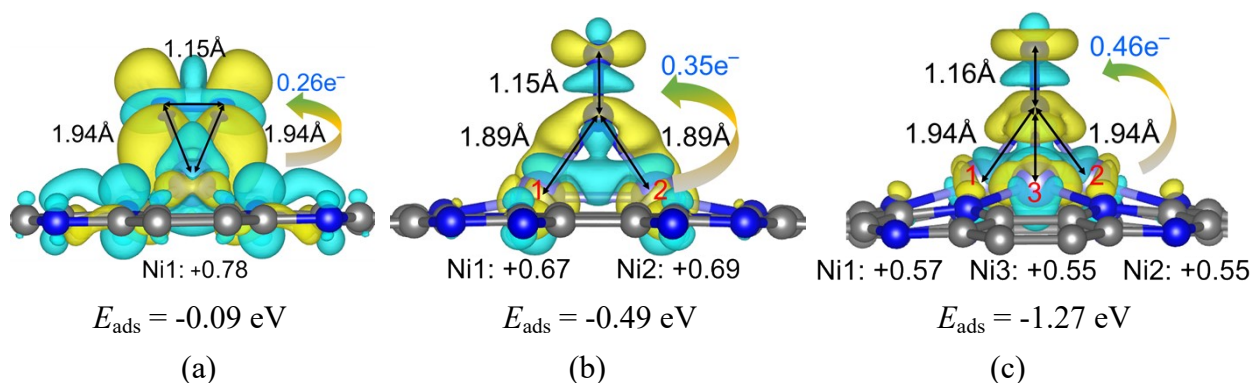

**Figure S4.** Isosurface of charge density difference for  $\text{N}_2$  binding on  $\text{M}_n@C_2N$  (a)  $\text{Ni}_1@C_2N$ , (b)  $\text{Ni}_2@C_2N$ , (c)  $\text{Ni}_3@C_2N$  in side-on or end-on configuration. The corresponding bond length and the charge transferred to adsorbed  $\text{N}_2$  are labeled. Isosurface level=0.004 e/Bohr<sup>3</sup>. Yellow: charge accumulation; Cyan: charge depletion.

|                 |                | *N <sub>2</sub> | *N <sub>2</sub> H |
|-----------------|----------------|-----------------|-------------------|
| Ni <sub>2</sub> |                |                 |                   |
|                 |                |                 |                   |
|                 | $\mu = 0\mu_B$ | $\mu = -2\mu_B$ | $\mu = 0\mu_B$    |

**Figure S5.** Net spin density for  $\text{Ni}_2@C_2N$  (\*N<sub>2</sub> and \*N<sub>2</sub>H) at the isosurface level of 0.004 e/Bohr<sup>3</sup>.



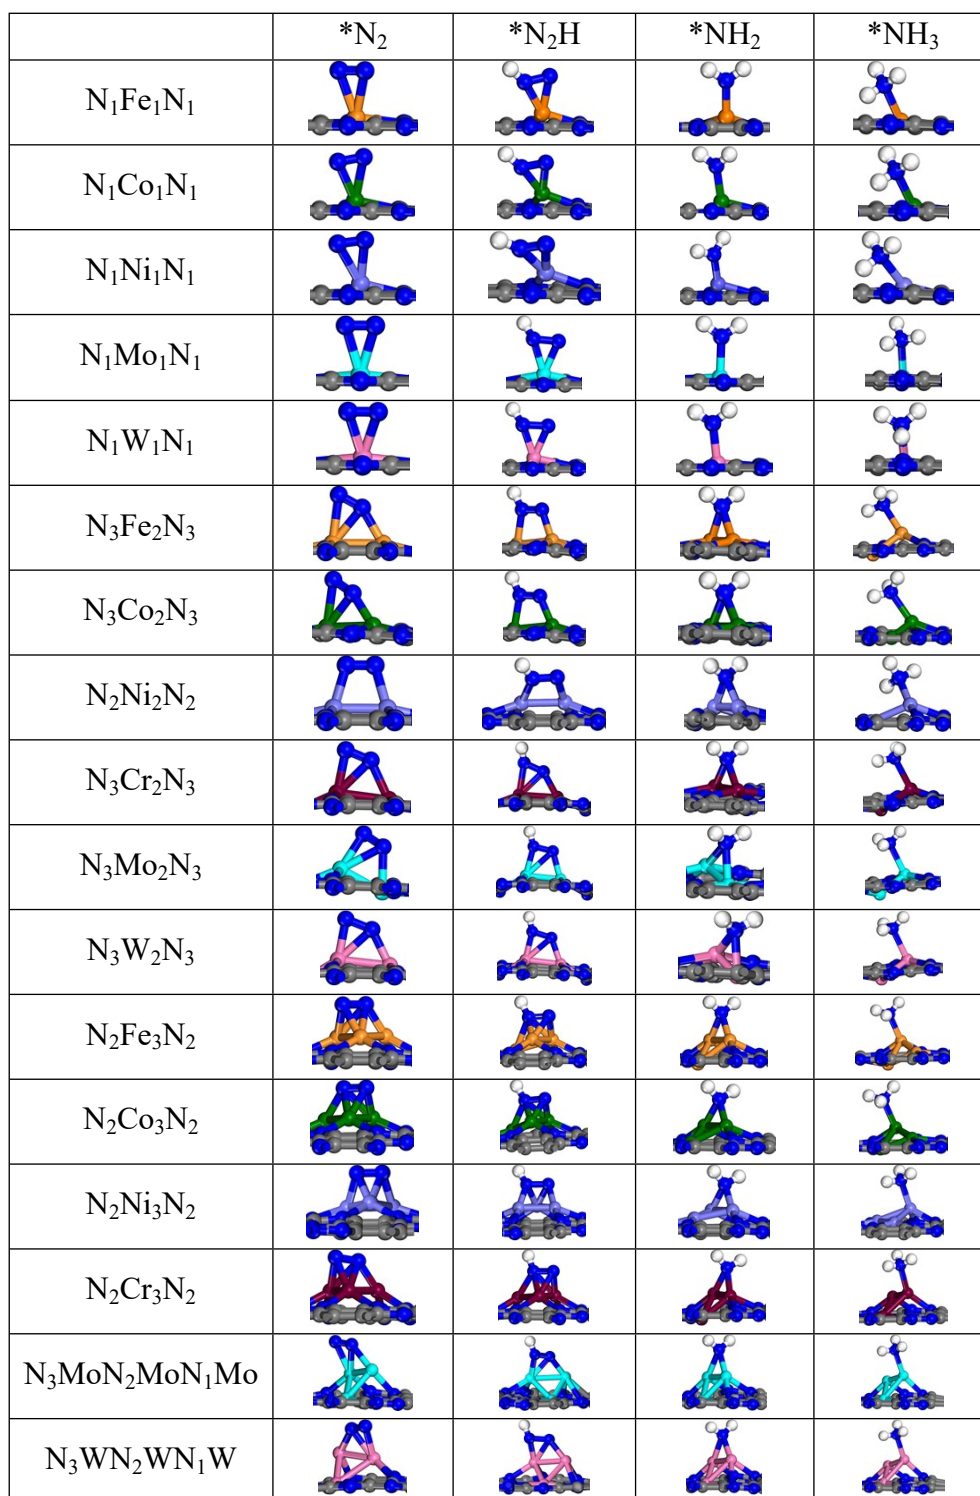

**Figure S6.** DFT-optimized structures of \*N<sub>2</sub>, \*N<sub>2</sub>H, \*NH<sub>2</sub> and \*NH<sub>3</sub> on M<sub>n</sub>@C<sub>2</sub>N.

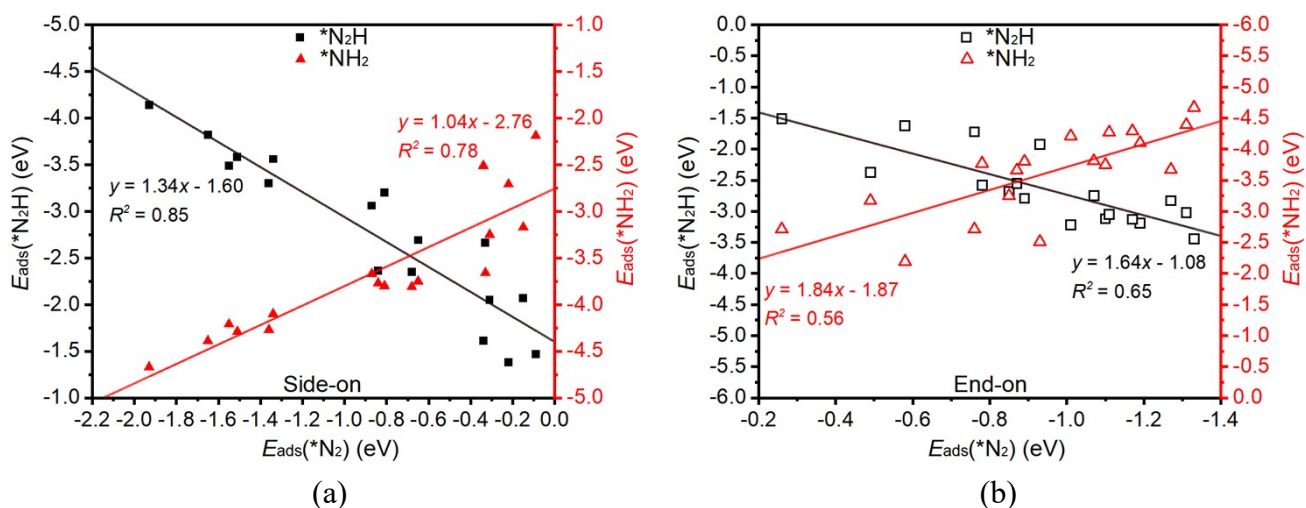

**Figure S7.** Scaling relations for adsorption energy ( $E_{\text{ads}}$ ) of  $^*\text{N}_2\text{H}/^*\text{N}_2$  and  $^*\text{NH}_2/^*\text{N}_2$  for (a) side-on and (b) end-on mode of  $^*\text{N}_2$ , where  $E_{\text{ads}}$  is referenced to gaseous  $\text{N}_2$ ,  $\text{N}_2\text{H}$  and  $\text{NH}_2$  for absolute binding strength.

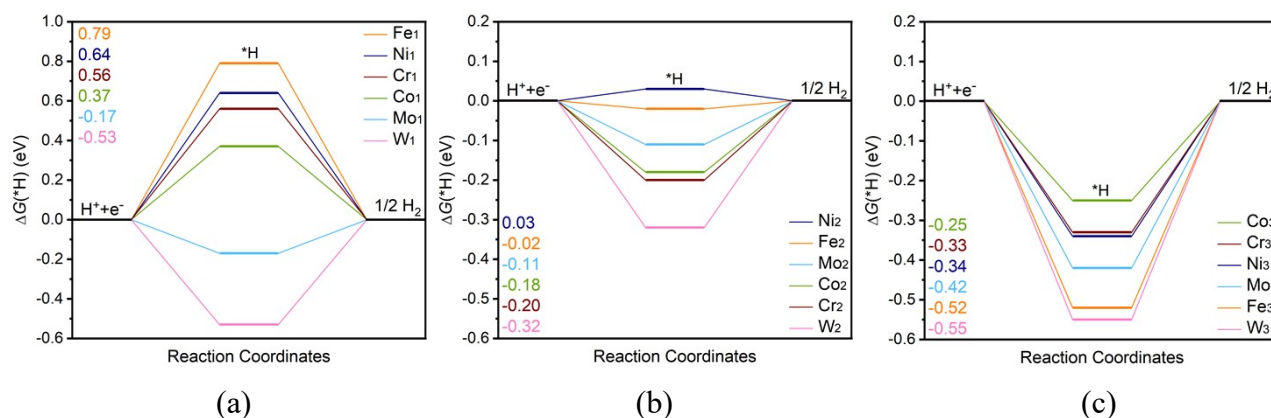

**Figure S8.** Gibbs free energy diagrams for Volmer-Heyrovsky mechanism of HER on  $\text{M}_n@C_2\text{N}$  at 0 V (vs. RHE). The full coverage of  $^*\text{H}$  was employed to calculate  $^*\text{H}$  binding on  $\text{M}_n@C_2\text{N}$  whose largest  $E_{\text{ads}}$  was chosen for HER (Figure S9).

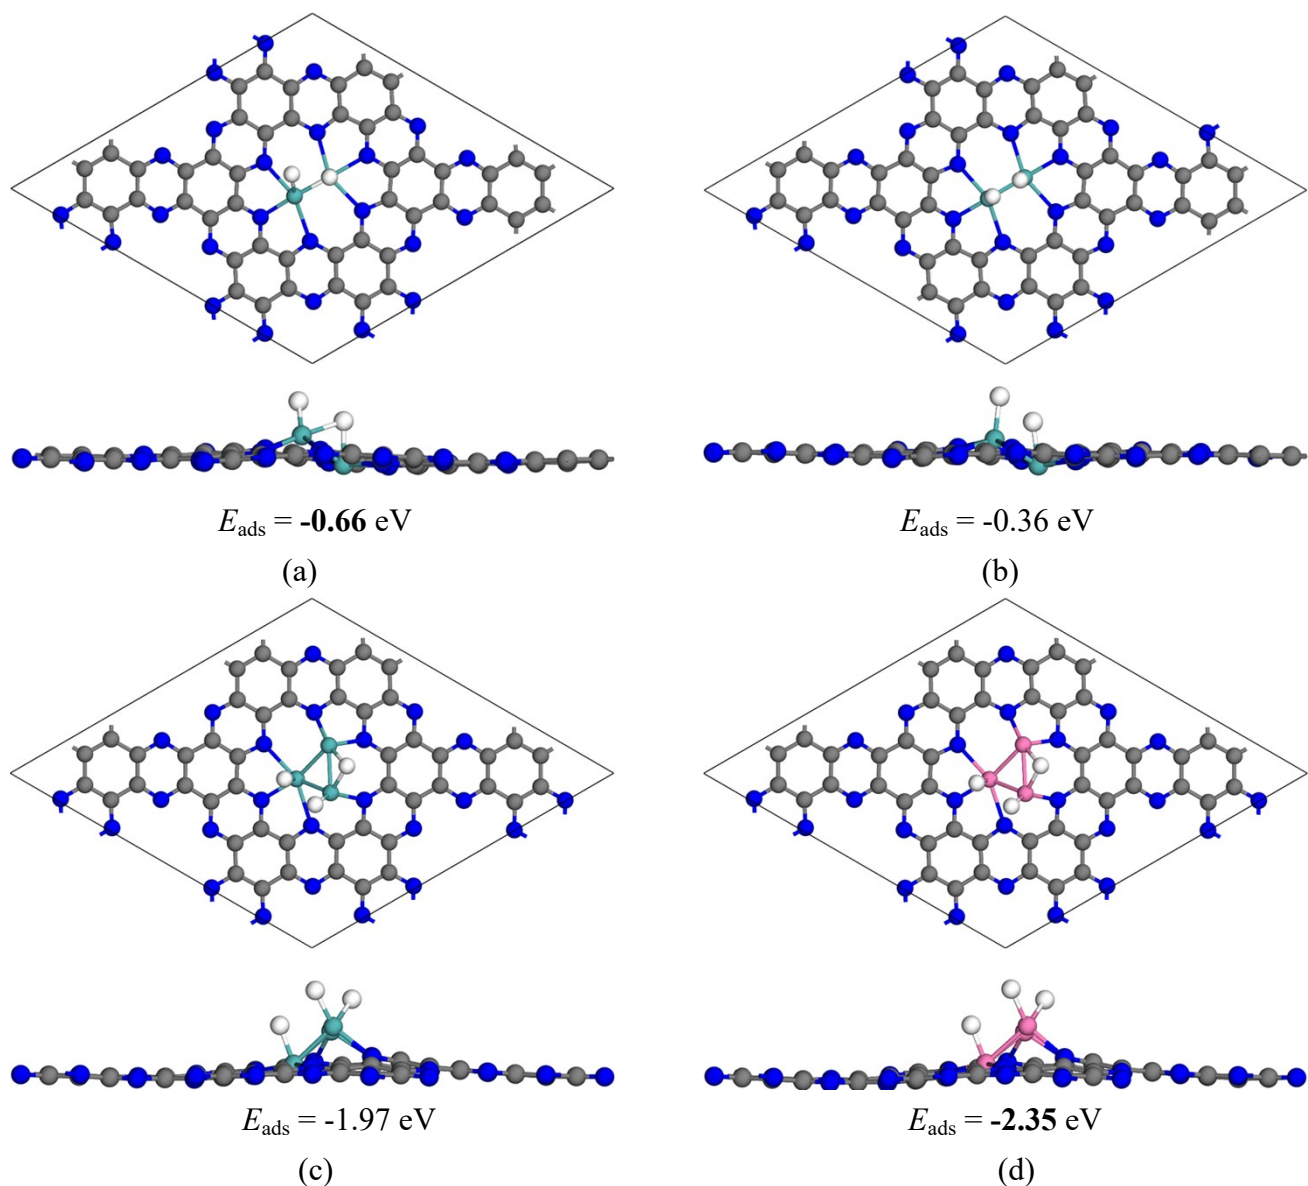

**Figure S9.** Adsorption configurations of full coverage of \*H on (a) Mo<sub>2</sub>@C<sub>2</sub>N, (b) Mo<sub>2</sub>@C<sub>2</sub>N, (c) Mo<sub>3</sub>@C<sub>2</sub>N, (d) W<sub>3</sub>@C<sub>2</sub>N.

1. Wang, H.; Liu, Z., Comprehensive Mechanism and Structure-Sensitivity of Ethanol Oxidation on Platinum: New Transition-State Searching Method for Resolving the Complex Reaction Network. *J. Am. Chem. Soc.* **2008**, *130*, 10996-11004.
